# Supplementary material for: Genome‐wide population structure and admixture analysis reveals weak differentiation among Ugandan goat breeds
Source: PubMed Central journal article supplement (PMC5838551; doi:10.1111/age.12631), 2018-01-17

**Figure S2** Cross-validation error plot indicating the choice of the appropriate  $K$  value.

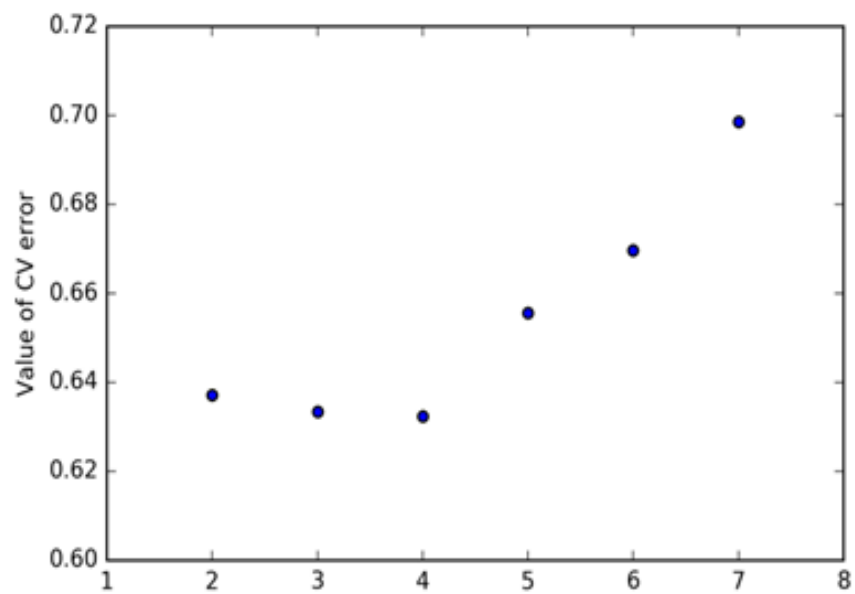

Supplement: AGE-49-59-s002.pdf [file AGE-49-59-s002.pdf]
