# Supplementary material for: Genome‐wide population structure and admixture analysis reveals weak differentiation among Ugandan goat breeds
Source: PubMed Central journal article supplement (PMC5838551; doi:10.1111/age.12631), 2018-01-17
Supplement: AGE-49-59-s003.pdf [file AGE-49-59-s003.pdf]

**Table S1:** Results of four population tests showing significant  $f_4$  statistics for Ugandan goats indicating gene-flow in the populations.

| <b>Pop 1</b>      | <b>Pop 2</b> | <b>Pop 3</b> | <b>Pop 4</b> | <b><math>f_4</math> statistic</b> | <b>Std error</b> | <b>Z Score</b> |
|-------------------|--------------|--------------|--------------|-----------------------------------|------------------|----------------|
| BOE               | KIG          | KAR          | MUB          | 0.0050                            | 0.0002           | 20.5959        |
| BOE               | MUB          | KAR          | KIG          | 0.0051                            | 0.0003           | 20.4125        |
| BOE               | KIG          | KAR          | SEA          | 0.0027                            | 0.0003           | 10.2101        |
| BOE               | KAR          | KIG          | SEB          | 0.0033                            | 0.0003           | 12.5043        |
| BOE               | KIG          | KAR          | SEB          | 0.0022                            | 0.0002           | 14.3987        |
| BOE               | MUB          | KAR          | SEA          | 0.0027                            | 0.0003           | 10.8053        |
| BOE               | KAR          | MUB          | SEB          | 0.0034                            | 0.0002           | 16.4090        |
| BOE               | MUB          | KAR          | SEB          | 0.0018                            | 0.0002           | 12.1647        |
| BOE               | KAR          | SEA          | SEB          | 0.0020                            | 0.0002           | 9.2824         |
| BOE               | SEA          | KAR          | SEB          | 0.0014                            | 0.0002           | 8.2888         |
| BOE               | KAR          | MUB          | SEA          | 0.0014                            | 0.0002           | 6.0396         |
| BOE               | SEA          | KAR          | MUB          | 0.0013                            | 0.0002           | 5.6349         |
| BOE               | SEA          | KAR          | KIG          | 0.0014                            | 0.0003           | 5.0805         |
| BOE               | SEB          | MUB          | SEA          | 0.0010                            | 0.0002           | 4.4690         |
| BOE               | KAR          | KIG          | SEA          | 0.0013                            | 0.0003           | 4.4078         |
| BOE               | SEB          | KAR          | KIG          | -0.0011                           | 0.0003           | -4.0038        |
| BOE               | MUB          | SEA          | SEB          | -0.0009                           | 0.0002           | -4.1880        |
| BOE               | SEB          | KAR          | MUB          | -0.0016                           | 0.0002           | -6.4749        |
| BOE               | KIG          | MUB          | SEA          | -0.0023                           | 0.0002           | -9.8169        |
| BOE               | MUB          | KIG          | SEA          | -0.0024                           | 0.0003           | -9.4555        |
| BOE               | KIG          | MUB          | SEB          | -0.0028                           | 0.0002           | -12.9529       |
| BOE               | MUB          | KIG          | SEB          | -0.0033                           | 0.0002           | -14.3171       |
| <b>Karamojong</b> |              |              |              |                                   |                  |                |
| KAR               | SEB          | MUB          | SEA          | -0.0004                           | 0.0001           | -4.5315        |
| KAR               | SEB          | KIG          | MUB          | -0.0004                           | 0.0001           | -5.4680        |

| <b>Pop 1</b>  | <b>Pop 2</b> | <b>Pop 3</b> | <b>Pop 4</b> | <i>f4 statistic</i> | <b>Std error (se)</b> | <b>Z Score</b> |
|---------------|--------------|--------------|--------------|---------------------|-----------------------|----------------|
| KAR           | SEB          | KIG          | SEA          | -0.0008             | 0.0001                | -7.0525        |
| KAR           | KIG          | MUB          | SEA          | -0.0037             | 0.0001                | -29.0164       |
| KAR           | MUB          | KIG          | SEA          | -0.0037             | 0.0001                | -27.2518       |
| KAR           | KIG          | MUB          | SEB          | -0.0062             | 0.0001                | -47.4086       |
| KAR           | MUB          | KIG          | SEB          | -0.0066             | 0.0001                | -47.1151       |
| KAR           | KIG          | SEA          | SEB          | -0.0025             | 0.0001                | -18.3191       |
| KAR           | SEA          | KIG          | SEB          | -0.0033             | 0.0001                | -22.1784       |
| KAR           | MUB          | SEA          | SEB          | -0.0029             | 0.0001                | -23.6741       |
| KAR           | SEA          | MUB          | SEB          | -0.0033             | 0.0001                | -23.2563       |
| <b>Kigezi</b> |              |              |              |                     |                       |                |
| KIG           | SEA          | MUB          | SEB          | 0.0029              | 0.0001                | 23.4857        |
| KIG           | SEB          | MUB          | SEA          | 0.0033              | 0.0001                | 28.0769        |
| KIG           | MUB          | SEA          | SEB          | -0.0004             | 0.0001                | -4.3254        |

BOE=Boer, KAR=Karamojong, KIG=Kigezi, MUB=Mubende, SEA=Small East African and SEB=Sebei goats. All Z-scores are significant ( $p < 0.05$ ) indicating presence of gene-flow
