# Supplementary material for: Genome‐wide population structure and admixture analysis reveals weak differentiation among Ugandan goat breeds
Source: PubMed Central journal article supplement (PMC5838551; doi:10.1111/age.12631), 2018-01-17
Supplement: AGE-49-59-s004.pdf [file AGE-49-59-s004.pdf]

**Table S2** Breed composition of cluster 1, 2, 3 and 4, interpreted as representative of Small East African, Karamojong/Sebei, Boer and Kigezi ancestries respectively, estimated for each individual belonging to goat populations from Uganda.

| <b>Animal</b> | <b>Breed</b> | <b>Cluster 1<br/>(SEA)</b> | <b>Cluster 2<br/>(KAR/SEB)</b> | <b>Cluster 3<br/>(BOE)</b> | <b>Cluster 4<br/>(KIG)</b> |
|---------------|--------------|----------------------------|--------------------------------|----------------------------|----------------------------|
| BOE132        | BOE          | 0.0000                     | 0.0000                         | 1.0000                     | 0.0000                     |
| BOE133        | BOE          | 0.0006                     | 0.0676                         | 0.9318                     | 0.0000                     |
| BOE137        | BOE          | 0.0000                     | 0.0000                         | 1.0000                     | 0.0000                     |
| BOE138        | BOE          | 0.0000                     | 0.0000                         | 1.0000                     | 0.0000                     |
| BOE140        | BOE          | 0.0000                     | 0.0000                         | 1.0000                     | 0.0000                     |
| BOE141        | BOE          | 0.0000                     | 0.0000                         | 1.0000                     | 0.0000                     |
| BOE121        | BOE          | 0.0000                     | 0.0000                         | 1.0000                     | 0.0000                     |
| BOE122        | BOE          | 0.0000                     | 0.0000                         | 1.0000                     | 0.0000                     |
| BOE124        | BOE          | 0.0000                     | 0.0000                         | 1.0000                     | 0.0000                     |
| BOE125        | BOE          | 0.0529                     | 0.0179                         | 0.7707                     | 0.1586                     |
| BOE126        | BOE          | 0.0426                     | 0.0521                         | 0.7572                     | 0.1482                     |
| BOE127        | BOE          | 0.0057                     | 0.0723                         | 0.9221                     | 0.0000                     |
| BOE129        | BOE          | 0.0028                     | 0.0256                         | 0.9715                     | 0.0000                     |
| KAR161        | KAR          | 0.0581                     | 0.9079                         | 0.0340                     | 0.0000                     |
| KAR165        | KAR          | 0.0941                     | 0.8443                         | 0.0465                     | 0.0151                     |
| KAR167        | KAR          | 0.2576                     | 0.6264                         | 0.0000                     | 0.1159                     |
| KAR169        | KAR          | 0.0450                     | 0.8917                         | 0.0575                     | 0.0059                     |
| KAR174        | KAR          | 0.0399                     | 0.9026                         | 0.0494                     | 0.0081                     |
| KAR178        | KAR          | 0.0000                     | 0.9996                         | 0.0004                     | 0.0000                     |
| KAR179        | KAR          | 0.0000                     | 0.9833                         | 0.0167                     | 0.0000                     |
| KAR180        | KAR          | 0.1140                     | 0.7552                         | 0.0167                     | 0.1141                     |
| KAR185        | KAR          | 0.0609                     | 0.8804                         | 0.0582                     | 0.0005                     |
| KAR186        | KAR          | 0.0564                     | 0.8332                         | 0.0465                     | 0.0639                     |
| KAR187        | KAR          | 0.0574                     | 0.8779                         | 0.0534                     | 0.0112                     |
| KAR188        | KAR          | 0.0495                     | 0.8749                         | 0.0756                     | 0.0000                     |
| KAR189        | KAR          | 0.1613                     | 0.7839                         | 0.0025                     | 0.0522                     |
| KAR191        | KAR          | 0.1011                     | 0.8989                         | 0.0000                     | 0.0000                     |
| KAR192        | KAR          | 0.2715                     | 0.5331                         | 0.0078                     | 0.1876                     |
| KIG106        | KIG          | 0.0666                     | 0.0576                         | 0.0000                     | 0.8758                     |
| KIG108        | KIG          | 0.0713                     | 0.0000                         | 0.0000                     | 0.9286                     |
| KIG109        | KIG          | 0.0661                     | 0.2067                         | 0.2001                     | 0.5272                     |
| KIG107        | KIG          | 0.0734                     | 0.0377                         | 0.1186                     | 0.7702                     |
| KIG081        | KIG          | 0.0608                     | 0.1029                         | 0.1766                     | 0.6598                     |
| KIG088        | KIG          | 0.0000                     | 0.0000                         | 0.0000                     | 1.0000                     |
| KIG089        | KIG          | 0.0000                     | 0.0000                         | 0.0250                     | 0.9750                     |
| KIG090        | KIG          | 0.0071                     | 0.0000                         | 0.0000                     | 0.9929                     |
| KIG091        | KIG          | 0.0000                     | 0.0000                         | 0.0000                     | 1.0000                     |
| KIG092        | KIG          | 0.0230                     | 0.0000                         | 0.1125                     | 0.8645                     |
| KIG093        | KIG          | 0.0000                     | 0.0000                         | 0.0000                     | 1.0000                     |

|        |     |        |        |        |        |
|--------|-----|--------|--------|--------|--------|
| KIG094 | KIG | 0.0000 | 0.0000 | 0.0000 | 1.0000 |
| KIG096 | KIG | 0.0613 | 0.0910 | 0.2393 | 0.6083 |
| KIG097 | KIG | 0.0306 | 0.0679 | 0.1169 | 0.7846 |
| KIG098 | KIG | 0.0000 | 0.0000 | 0.0000 | 1.0000 |
| KIG099 | KIG | 0.0323 | 0.0408 | 0.0862 | 0.8407 |
| KIG100 | KIG | 0.0000 | 0.0000 | 0.0000 | 1.0000 |
| KIG101 | KIG | 0.0000 | 0.0000 | 0.0000 | 1.0000 |
| KIG102 | KIG | 0.0000 | 0.0000 | 0.0000 | 1.0000 |
| KIG103 | KIG | 0.0059 | 0.0238 | 0.1415 | 0.8288 |
| KIG104 | KIG | 0.0000 | 0.0000 | 0.0000 | 1.0000 |
| KIG105 | KIG | 0.0000 | 0.0000 | 0.0000 | 1.0000 |
| KIG086 | KIG | 0.0000 | 0.0000 | 0.0000 | 1.0000 |
| KIG087 | KIG | 0.0181 | 0.0000 | 0.0000 | 0.9819 |
| KIG082 | KIG | 0.0000 | 0.0000 | 0.0000 | 1.0000 |
| KIG083 | KIG | 0.0000 | 0.0000 | 0.0000 | 1.0000 |
| KIG084 | KIG | 0.0553 | 0.0701 | 0.0351 | 0.8396 |
| KIG111 | KIG | 0.0227 | 0.0517 | 0.0000 | 0.9256 |
| KIG112 | KIG | 0.0548 | 0.0342 | 0.0557 | 0.8554 |
| MUB051 | MUB | 0.2042 | 0.1914 | 0.0153 | 0.5891 |
| MUB066 | MUB | 0.2156 | 0.1830 | 0.0529 | 0.5485 |
| MUB067 | MUB | 0.2101 | 0.2692 | 0.0053 | 0.5154 |
| MUB055 | MUB | 0.1947 | 0.2184 | 0.0183 | 0.5686 |
| MUB061 | MUB | 0.1934 | 0.2385 | 0.0029 | 0.5652 |
| MUB062 | MUB | 0.2301 | 0.1935 | 0.0624 | 0.5140 |
| MUB068 | MUB | 0.2229 | 0.2407 | 0.0000 | 0.5364 |
| MUB073 | MUB | 0.1814 | 0.3554 | 0.0149 | 0.4483 |
| MUB074 | MUB | 0.1886 | 0.2921 | 0.1060 | 0.4133 |
| MUB060 | MUB | 0.1979 | 0.1679 | 0.0989 | 0.5353 |
| MUB053 | MUB | 0.2245 | 0.2429 | 0.0353 | 0.4973 |
| MUB059 | MUB | 0.2020 | 0.2655 | 0.0274 | 0.5052 |
| MUB052 | MUB | 0.2145 | 0.2636 | 0.0268 | 0.4951 |
| MUB056 | MUB | 0.2468 | 0.2301 | 0.0192 | 0.5038 |
| MUB064 | MUB | 0.2337 | 0.2147 | 0.0000 | 0.5516 |
| MUB046 | MUB | 0.1721 | 0.1557 | 0.1850 | 0.4872 |
| MUB047 | MUB | 0.2398 | 0.3022 | 0.0000 | 0.4580 |
| MUB050 | MUB | 0.2129 | 0.2390 | 0.0060 | 0.5421 |
| MUB057 | MUB | 0.1826 | 0.1349 | 0.1117 | 0.5708 |
| MUB058 | MUB | 0.1902 | 0.1265 | 0.1078 | 0.5755 |
| MUB070 | MUB | 0.1804 | 0.3547 | 0.0198 | 0.4451 |
| MUB071 | MUB | 0.1879 | 0.4201 | 0.0000 | 0.3920 |
| MUB072 | MUB | 0.2020 | 0.3417 | 0.0205 | 0.4357 |
| MUB075 | MUB | 0.2241 | 0.2255 | 0.0230 | 0.5275 |
| MUB076 | MUB | 0.2201 | 0.2717 | 0.0194 | 0.4888 |
| MUB063 | MUB | 0.1852 | 0.2138 | 0.0935 | 0.5075 |

|        |     |        |        |        |        |
|--------|-----|--------|--------|--------|--------|
| MUB069 | MUB | 0.1770 | 0.2619 | 0.1954 | 0.3657 |
| MUB041 | MUB | 0.1666 | 0.2536 | 0.0635 | 0.5162 |
| MUB042 | MUB | 0.1687 | 0.2501 | 0.1035 | 0.4778 |
| SEA002 | SEA | 0.4465 | 0.3744 | 0.0121 | 0.1669 |
| SEA003 | SEA | 0.5727 | 0.1914 | 0.0919 | 0.1440 |
| SEA004 | SEA | 1.0000 | 0.0000 | 0.0000 | 0.0000 |
| SEA005 | SEA | 0.6671 | 0.2003 | 0.0000 | 0.1326 |
| SEA006 | SEA | 1.0000 | 0.0000 | 0.0000 | 0.0000 |
| SEA007 | SEA | 1.0000 | 0.0000 | 0.0000 | 0.0000 |
| SEA008 | SEA | 0.6615 | 0.1935 | 0.0168 | 0.1282 |
| SEA009 | SEA | 0.6849 | 0.1517 | 0.0000 | 0.1634 |
| SEA011 | SEA | 0.3394 | 0.3817 | 0.0000 | 0.2789 |
| SEA012 | SEA | 0.7611 | 0.1270 | 0.0000 | 0.1118 |
| SEA013 | SEA | 0.7908 | 0.1032 | 0.0000 | 0.1060 |
| SEA014 | SEA | 0.7312 | 0.1663 | 0.0000 | 0.1025 |
| SEA015 | SEA | 0.7088 | 0.1508 | 0.0038 | 0.1367 |
| SEA018 | SEA | 0.6786 | 0.0999 | 0.0885 | 0.1330 |
| SEA020 | SEA | 1.0000 | 0.0000 | 0.0000 | 0.0000 |
| SEA021 | SEA | 0.8327 | 0.1116 | 0.0000 | 0.0557 |
| SEA022 | SEA | 0.8111 | 0.1245 | 0.0000 | 0.0645 |
| SEA023 | SEA | 0.7242 | 0.1586 | 0.0000 | 0.1172 |
| SEA025 | SEA | 1.0000 | 0.0000 | 0.0000 | 0.0000 |
| SEA026 | SEA | 1.0000 | 0.0000 | 0.0000 | 0.0000 |
| SEA027 | SEA | 0.7184 | 0.1276 | 0.0154 | 0.1386 |
| SEA028 | SEA | 0.8039 | 0.1081 | 0.0000 | 0.0880 |
| SEA029 | SEA | 0.7834 | 0.1160 | 0.0282 | 0.0724 |
| SEA030 | SEA | 1.0000 | 0.0000 | 0.0000 | 0.0000 |
| SEA031 | SEA | 1.0000 | 0.0000 | 0.0000 | 0.0000 |
| SEA032 | SEA | 0.7619 | 0.1319 | 0.0131 | 0.0932 |
| SEA033 | SEA | 0.7943 | 0.0876 | 0.0000 | 0.1181 |
| SEA034 | SEA | 0.8092 | 0.1026 | 0.0000 | 0.0882 |
| SEA024 | SEA | 0.4307 | 0.3623 | 0.0000 | 0.2070 |
| SEB232 | SEB | 0.1520 | 0.6956 | 0.0001 | 0.1523 |
| SEB217 | SEB | 0.1825 | 0.5895 | 0.0373 | 0.1907 |
| SEB218 | SEB | 0.1095 | 0.7059 | 0.0132 | 0.1714 |
| SEB219 | SEB | 0.0220 | 0.8817 | 0.0000 | 0.0963 |
| SEB207 | SEB | 0.1635 | 0.6530 | 0.0131 | 0.1703 |
| SEB208 | SEB | 0.1980 | 0.6346 | 0.0012 | 0.1662 |
| SEB228 | SEB | 0.1006 | 0.7817 | 0.0000 | 0.1178 |
| SEB229 | SEB | 0.0585 | 0.8038 | 0.0320 | 0.1058 |
| SEB220 | SEB | 0.0971 | 0.5467 | 0.0921 | 0.2641 |
| SEB222 | SEB | 0.0779 | 0.7473 | 0.0100 | 0.1649 |
| SEB223 | SEB | 0.0143 | 0.8756 | 0.0000 | 0.1101 |
| SEB204 | SEB | 0.1373 | 0.6515 | 0.0114 | 0.1998 |

|        |     |        |        |        |        |
|--------|-----|--------|--------|--------|--------|
| SEB230 | SEB | 0.0620 | 0.8328 | 0.0000 | 0.1052 |
| SEB231 | SEB | 0.0275 | 0.9218 | 0.0000 | 0.0506 |
| SEB203 | SEB | 0.1062 | 0.6934 | 0.0000 | 0.2003 |
| SEB224 | SEB | 0.0245 | 0.8714 | 0.0403 | 0.0637 |
| SEB225 | SEB | 0.0000 | 1.0000 | 0.0000 | 0.0000 |
| SEB226 | SEB | 0.0000 | 0.9577 | 0.0000 | 0.0423 |
| SEB227 | SEB | 0.0976 | 0.6782 | 0.0494 | 0.1749 |
| SEB216 | SEB | 0.0403 | 0.8693 | 0.0020 | 0.0884 |
| SEB214 | SEB | 0.0000 | 0.9485 | 0.0000 | 0.0515 |
| SEB215 | SEB | 0.0271 | 0.8571 | 0.0000 | 0.1158 |
| SEB201 | SEB | 0.1551 | 0.6791 | 0.0063 | 0.1594 |
| SEB202 | SEB | 0.1196 | 0.6878 | 0.0238 | 0.1688 |
| SEB205 | SEB | 0.0465 | 0.8083 | 0.0000 | 0.1452 |
| SEB206 | SEB | 0.0645 | 0.7941 | 0.0000 | 0.1414 |
| SEB210 | SEB | 0.0000 | 0.9473 | 0.0000 | 0.0527 |
| SEB211 | SEB | 0.1247 | 0.7089 | 0.0146 | 0.1518 |
| SEB213 | SEB | 0.0120 | 0.9199 | 0.0000 | 0.0682 |

---

BOE=Boer, KAR=Karamojong, KIG=Kigezi, MUB=Mubende, SEA=Small East African and  
SEB=Sebei goats.
